1 **Title: *Antennapedia* regulates metallic silver wing scale development and cell**  
2 **shape in *Bicyclus anynana* butterflies**

3 **Authors:** Anupama Prakash<sup>1\*</sup>, Cédric Finet<sup>2</sup>, Vinodkumar Saranathan<sup>2</sup>, Antónia Monteiro<sup>1,2\*</sup>

4 **Affiliations:**

5 <sup>1</sup> Department of Biological Sciences, National University of Singapore, Singapore.

6 <sup>2</sup> Division of Science, Yale-NUS College, National University of Singapore, Singapore.

7 \*Correspondence to: [anupama@u.nus.edu](mailto:anupama@u.nus.edu) or [antonia.monteiro@nus.edu.sg](mailto:antonia.monteiro@nus.edu.sg)

8

9 **Abstract:** Butterfly wing scale cells can develop very intricate cuticular nanostructures that  
10 interact with light to produce structural colors such as silver, but the genetic basis of such  
11 nanostructures is mostly unexplored. Here, we address the genetic basis of metallic silver scale  
12 development by leveraging existing crispants in the butterfly *Bicyclus anynana*, where knockouts  
13 of five genes – *apterous A*, *Ultrabithorax*, *doublesex*, *Antennapedia* and *optix* – either led to  
14 ectopic gains or losses of silver scales. Most wildtype silver scales had low amounts of  
15 pigmentation and exhibited a common ultrastructural modification for metallic broadband  
16 reflectance, i.e., an undulatory air layer enclosed by an upper and lower lamina. Crispant brown  
17 scales differed from wildtype silver scales via the loss of the continuous upper lamina, increased  
18 lower lamina thickness, and increased pigmentation. The reverse was seen when brown scales  
19 became silver. On the forewings, we identified *Antennapedia* as a high-level selector gene, acting  
20 through *doublesex* to induce silver scale development in males and having a novel, post-embryonic  
21 role in the determination of ridge and crossrib orientation and overall scale cell shape in both sexes.  
22 We propose that *apterous A* and *Ultrabithorax* repress *Antennapedia* on the dorsal forewings and  
23 ventral hindwings, respectively, thereby repressing silver scale development, whereas *apterous A*  
24 activates the same GRN on the dorsal hindwings, promoting silver scales.

25

26 **Introduction**

27 Silver or gold colors in insect cuticles (1–3), fish scales (4), and the eyes of cephalopods (1, 4–6)  
28 are all examples of naturally occurring broadband structural coloration. These colors/structures  
29 serve multiple ecological functions such as in promoting vision, in serving as inter- or intra-  
30 specific signals, or in thermoregulation (5, 7–12) and arise from the interaction of light with  
31 specific classes of broadband reflectors found in the animal integument (13–15).

32

33 Broadband metallic reflectors are highly reflective across a broad range of wavelengths and are  
34 often thick structures. The most common type of reflector involves thin film or multi-layer  
35 interference reflectors made of alternating materials with different refractive indices and varying  
36 thicknesses (1, 16). Chirped multilayer reflectors, which vary the optical thickness of each layer  
37 systematically with depth, are found in the exocuticle of gold beetles (16, 17) or the endocuticle  
38 of pupal cases in some butterflies (3, 18, 19). When the optical thickness of each layer changes  
39 randomly with depth, like in the alternating layers of guanine crystals and cytoplasm in fish scales,  
40 they form chaotic multilayer stacks that have silver reflectances (6, 20). Due to the small difference  
41 in refractive indices of biological materials, broadband multilayer reflectors with high reflectivity  
42 usually require a minimum of 10-20 alternating layers of high- and low-refractive index materials,  
43 leading to very thick (tens of microns) multilayer reflectors (19).

44

45 In contrast, broadband metallic reflectors found in lepidopteran wing scales are anatomically  
46 constrained by the thickness of the scales. These metallic reflectors are ultra-thin, with an overall  
47 thickness of a few microns (10, 21–24). It has been suggested that broadband reflectance is  
48 achieved by additive color mixing that occurs due to local spatial variation or disorder in the scale  
49 ultrastructure (10, 21, 23–25). An essential modification of the basic scale Bauplan to produce  
50 such broadband reflectors appears to be the consistent presence of a contiguous upper lamina that  
51 closes the normally “open” windows seen in a typical scale (10, 21, 24, 26). This creates an  
52 undulatory air layer sandwiched by the lower and upper laminae whose thicknesses also spatially  
53 vary. The broadband metallic reflectors, seen in fossil (23, 27) and extant moths (22), and more  
54 basal springtails (28), however, utilize thin film interference from a single chitin layer, resulting  
55 from fused scales. The lower lamina of an open-type plan scale in butterflies is often also tuned  
56 to produce broadband colors (29, 30). Therefore, both the necessity and the optical role of the  
57 upper lamina and the air layer in broadband color generation are enigmatic.

58

59 The production of metallic broadband reflectors may also depend on the presence or absence of  
60 pigments embedded in the scale cuticle. For instance, the brown ground scales in *Hypolimnys*  
61 *salmacis* or the yellow scales in *Heliconius* butterflies have a closed upper lamina, but these scales  
62 do not exhibit broadband reflectance due to the high concentration of pigments (31, 32).

63 Furthermore, the retention of an upper lamina in a *yellow* mutant in *Bicyclus anynana* butterflies  
64 (33), does not lead to metallic scales, either due to the presence of pigments or incorrect thicknesses  
65 of both the laminae and air gap in these scales. These examples suggest that the GRN that creates  
66 a metallic scale type must involve regulation of both scale ultrastructure and pigmentation. Yet,  
67 despite numerous studies having addressed the structural origins of biological broadband  
68 reflections across arthropods (3, 10, 19, 21, 23, 25) and its evolution within butterflies (24), the  
69 optical basis, the genetic circuits, and developmental mechanisms that create these broadband  
70 metallic reflectors remain sparse and unexplored.

71  
72 We have begun to explore the genetic basis of silver scale development with a series of CRISPR  
73 experiments performed in the nymphalid butterfly *B. anynana*. This species exhibits different types  
74 of broadband reflecting metallic scales on both fore- and hindwings (34). These scales are usually  
75 associated with the sex pheromone producing regions in males (the androconia), except for the  
76 coupling scales near the base of the wings that are present in both sexes. Previously, the knockout  
77 of five genes including *apterous A (apA)* (35), *Ultrabithorax (Ubx)* (36), *doublesex (dsx)* (34),  
78 *Antennapedia (Antp)* (36) and *optix* (37) led to phenotypic effects on metallic scale development  
79 in *B. anynana* (Fig 1A). Some knockouts produced ectopic brown to silver scale transformations  
80 (*Ubx* and *apA*), whereas other knockouts led to the loss of silver broadband reflection and turned  
81 the scales brown (*Antp*, *dsx*, *apA* and *optix*) (Fig 1A). These modified scales provide a great  
82 opportunity to investigate the structural basis of the different metallic colors in *B. anynana* scales  
83 and understand the roles of these five genes in creating broadband reflectors in lepidopterans.

84  
85 Here, we asked whether these genes modified different structural and pigmentary aspects and  
86 components of the scale to create a silver color, and vice versa, when silver scales became brown.  
87 We also investigated whether transformations of different structures and levels of pigmentation  
88 within a scale, with the manipulation of each gene in isolation, is complete or gradual. We  
89 hypothesized that more up-stream genes regulating the silver scale GRN will produce more  
90 complete and extreme transformations of the scales, making them resemble a wildtype silver scale  
91 (or a brown scale) more closely. We also posited that each gene may be involved in regulating a  
92 subset of the characteristics of silver or brown scales, or, alternatively, may be regulating all of its  
93 distinctive traits but only partially.

94

95 To answer these questions, we used light, conventional and focused ion beam (FIB) scanning  
96 electron microscopy (SEM), UV-VIS-NIR microspectrophotometry, and systematic optical  
97 modeling, to understand different aspects of the wildtype (WT) and transformed scales. We show  
98 that the variable air gap thickness in silver scales is an important determinant of the broadband  
99 reflectance. Transformation of silver to brown scales is accompanied by the loss of the contiguous  
100 upper lamina, increases in lower lamina thickness and gains in pigmentation. The opposite occurs  
101 when brown scales become silver scales. In addition, we identify *Antp* as a top regulator of the  
102 silver scale GRN along with a novel role of this gene in determining scale shape.

103

## 104 **Results**

### 105 **Ultrastructural and optical origin of broadband silver reflections in *Bicyclus anynana*** 106 **butterflies**

107 We first investigated how the silver color is produced in five types of silver scales present on the  
108 wings of *B. anynana* using light reflection and absorbance measures, as well as SEM (Fig. 1B-F).  
109 On the ventral forewing, we focused on the silver and the gland scales on the androconial patch of  
110 males (Fig 1A, WT-FW arrows). On the dorsal hindwing, we sampled the silver and grey-silver  
111 scales near the androconial patches of males. Finally, we sampled coupling scales near the base of  
112 the dorsal hindwing in females (Fig 1A, WT-HW arrows). All silver scales generally feature  
113 rounded edges. The coupling scales, however, have a characteristic trowel-head shape (Fig 1F, F'),  
114 and their ridges are oriented at an angle to the proximo-distal axis of the scale as compared to the  
115 parallel arrangement of ridges in most other scale types. The abwing and adwing surfaces of the  
116 scales exhibited an oil-slick like multi-hued appearance, typical of a thin film with varying  
117 thickness (Fig 1B-F). The reflectance spectra of all silver scales exhibited broadband reflectance,  
118 with higher intensities from the adwing surface (Fig 1B'''-F'''). Pigmentation levels were low in all  
119 scales, as measured from low light absorbance (Fig 1B''''- F''''), with the exception of the grey-  
120 silver scales which absorbed more light, indicating the presence of pigments. All silver scales  
121 exhibited a closed upper lamina (Fig 1B''-F''). The different silver scale types exhibited varying  
122 levels of perforations in the total area of upper lamina (Fig 1H, Supplementary Table S5 – source  
123 data): from ~0% (fore- and hindwing silver scales) and 2.35% (hindwing coupling scales), to 5.4%  
124 open (hindwing grey-silver scales) (Supplementary Tables S1,2). This correlation between the

125 integrity of the upper lamina coverage to the production of broadband reflectance affirms the  
126 important role attributed to the upper lamina and/or the enclosed air layer.

127

128

129

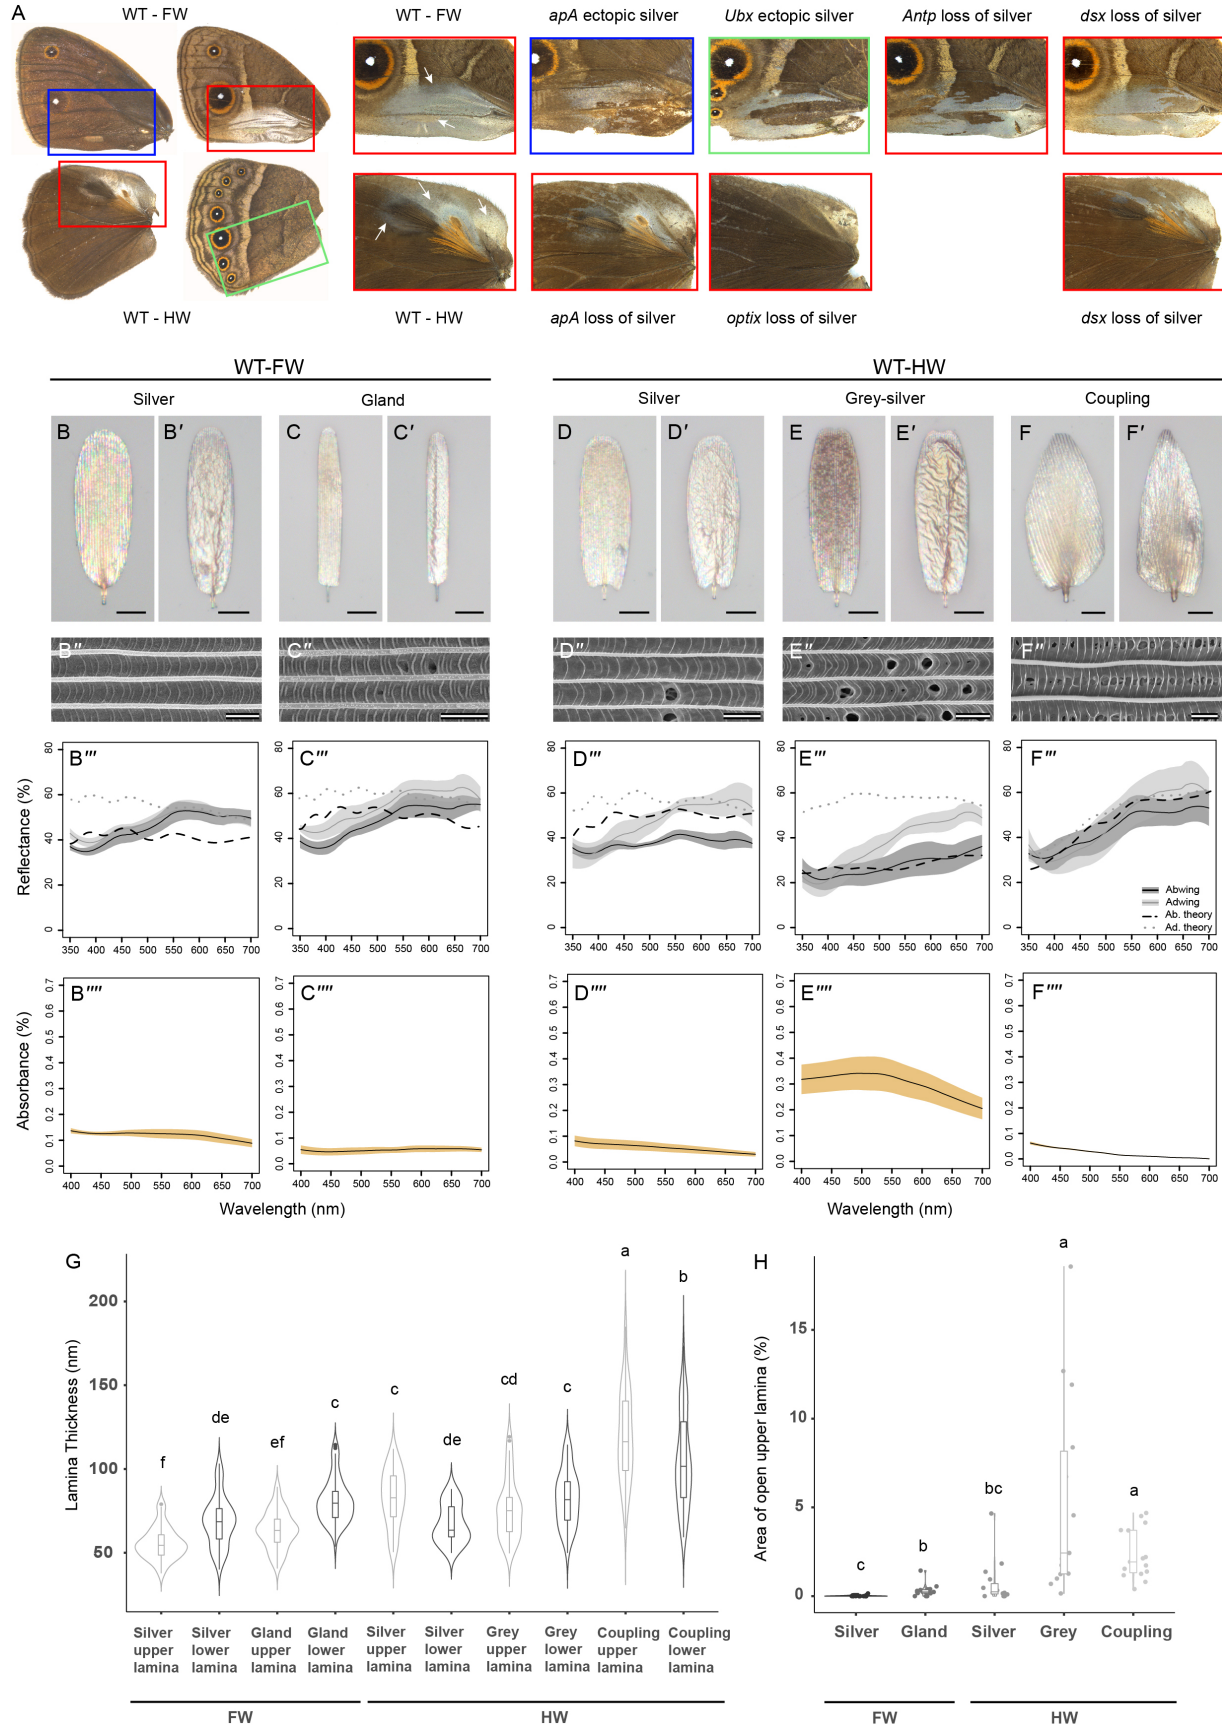

131 **Figure 1: *B. anynana* crispants sampled in this study and broadband reflectors in wildtype**  
132 ***B. anynana*.** (A) WT dorsal and ventral wing surfaces with magnified views of the silver scales  
133 alongside ectopic silver scales or silver to brown transformed scales in crispants of the five genes.  
134 The colored box outlines indicate the position on the different wing surfaces of the WT and crispant  
135 scales. White arrows in the WT panels indicate the five different silver scale types characterized.  
136 Optical microscopy images of the abwing (upperside) (B-F) and adwing (underside) (B'-F')  
137 surfaces of single scales, SEM images of the abwing surface (B''-F''), measured and modeled  
138 reflectance (B'''-F''') and absorbance spectra (B''''-F''''') of the WT forewing silver and gland scales  
139 and the hindwing silver, grey-silver and coupling scales respectively. (G) Violin plots of the upper  
140 and lower lamina thicknesses of the different forewing and hindwing silver scales. (H) Area of the  
141 open upper lamina of the different silver scales on the forewings and hindwings. Boxplots show  
142 the median, inner and outer quartiles and whiskers up to 1.5 times the inter-quartile range. Means  
143 sharing the same letter are not significantly different (Tukey-adjusted comparisons). Scale bars:  
144 B,B'-F,F' are 20  $\mu\text{m}$  and B''-F'' are 2  $\mu\text{m}$ .

145  
146  
147 In order to theoretically model these broadband metallic colors, we measured the air gap, lower  
148 and upper lamina thicknesses from FIB-SEM cross-sections of the different silver scale types (Fig  
149 1G, Supplementary Table S5 – source data). The mean upper and lower lamina thicknesses of the  
150 different metallic scale types ranged from approximately 55-120 nm, with the coupling scales  
151 having the thickest lower and upper laminae (Fig 1G). We modeled the theoretical adwing and  
152 abwing spectra, the latter by incorporating the measured absorptivity curves (Fig 1B''''-F'''''), which  
153 produced broadband reflectance with a series of very shallow peaks, whose positions are largely  
154 consistent with those in the corresponding measured spectra (Fig 1B'''-F''', Supp Fig S1). A lower  
155 lamina thin film of an appropriate thickness could, alone, produce a broadband silver color (Supp  
156 Fig S2A). However, our results indicated that the presence of the additional upper lamina enclosing  
157 an air gap with varying thickness increased the mean broadband reflectivity by around 11% (Supp  
158 Fig S2A). Furthermore, our hierarchical modeling (Supp Figs S2 and S3) suggests that the  
159 observed variation in the upper and lower lamina thicknesses cannot reproduce the relatively flat  
160 broadband reflectance even when the sclerotized ridges are included (Supp Figs S2A-C), whereas  
161 the variation in the air gap layer, alone, can sufficiently account for the broadband silvery

162 reflectance, including the patches of distinct colors (e.g. pink and green) seen in between ridges in  
163 high magnification light micrographs (Fig 1B,B'-F,F', Supp Fig S2C) (24). Finally, our systematic  
164 parametric modeling (Supp Fig S3) revealed that the thicknesses of both upper and lower laminas  
165 for each of the silver scale types, except coupling, are more or less optimized to produce the  
166 maximum broadband reflectivity. By contrast, the air gap layer is sufficiently thick (> 750 nm) to  
167 ensure the broadband nature of the reflectivity, for a thickness of less than 500 nm will produce  
168 strong peak(s) with chromatic effects destroying the silvery appearance (Supp Fig S3).  
169 Interestingly, the modeling results predicted lower reflectivity at short wavelengths below 450 nm  
170 for the coupling scales (Supp Fig S2n) similar to their measured spectra (Fig 1F'''). Given that  
171 coupling scales are among the least pigmented (Fig. 1F'''), our results indicate that this lower  
172 reflectivity is a previously undocumented structural rather than a pigimentary effect. Further  
173 corroborating these modeling results, a longitudinal cross-section of the coupling scale showed a  
174 decrease in the thickness of the lower lamina from base to tip (Supp Fig S4) and a concomitant  
175 change in the color of the scale from bronze/brown in the base/center to silver at the tips. This  
176 increased thickness near the base of the scale suppresses shorter wavelengths of light and leads to  
177 a greyish darker color (Fig 1F'), while optimum thickness towards the tip reinforces broadband  
178 silver reflectance.

179

### 180 ***Antp* is a selector gene for rounded scale morphology and acts upstream of *dsx* in the silver** 181 **scale GRN**

182 Both *Antp* and *dsx* male crispants exhibited a silver to brown color transformation on the forewing  
183 but had different effects on scale shape (Fig 2A-C). The rounded edges of the distal end of the  
184 silver scales of *Antp* crispants changed into serrated finger-like projections, similar to other brown  
185 scales on the same wing surface (Fig 2D, Supp Fig S5A). This was true in females also, where the  
186 normal rounded brown scales on the posterior region of the ventral forewings became brown scales  
187 with dentate margins in the crispants (Supp Fig S5B). In contrast, the loss of *dsx* expression in the  
188 same region produced brown scales with a rounded distal edge (Fig 2E). Furthermore, some of the  
189 *Antp* crispant brown scales exhibited unusual ridge and crossrib orientations near the distal tips of  
190 the scales, often lying perpendicular to the normal parallel arrangement of ridges (Fig 2F). In *Antp*  
191 male crispants, we also noticed small clonal patches of brown scales within the hindwing silver  
192 scale area (Fig 2G). Such clonal patches were also visible on female hindwings in homologous



193 regions of the wing, though not as contrasting (Supp Fig 5D). The brown scales in these clonal  
194 patches had a dentate morphology similar to other dorsal hindwing scales, in contrast to the  
195 rounded scales seen in the hindwing silver scale region in males or the homologous regions in  
196 females (Supp Fig S5C, D).

197

198 Ultrastructure and pigmentation modifications accompanied the loss of silver reflectance in male  
199 scales of both crispant types. The brown crispant scales had lower reflectivity in comparison with  
200 the wildtype control scales (Fig 2A'''-C''') and this was accompanied by an increase in absorbance  
201 due to greater pigmentation (Fig 2A''''-C'''). The crispant brown scales also lost their continuous  
202 upper lamina which now exhibited perforated windows (Fig 2A''-C'', I, Supplementary Tables  
203 S1,2). Other ultrastructural modifications included an increase in lower lamina thickness (Fig 2H)  
204 (Posthoc tests from LME, adjusted P-values <0.001; Supplementary Tables S3,4). *Antp* brown  
205 scales had a greater lower lamina thickness ( $125.82 \text{ nm} \pm 19.7 \text{ nm}$ ) compared to the *dsx* brown  
206 scales ( $91.9 \text{ nm} \pm 17.6 \text{ nm}$ ) and both were significantly different from wildtype silver lower lamina  
207 thickness ( $68.8 \pm 14.75$ ). The increase in pigmentation, loss of the upper lamina and increased  
208 lower lamina thickness led to the loss of broadband metallic silver reflectance and created a brown  
209 color due to the combination of pigments and the now dominant lower lamina reflectance (Fig  
210 2A'''-C''').

211

212 These results suggest that *Antp* is an upstream selector gene of silver scale color and morphology  
213 in males and scale shape in females. *Antp* likely acts upstream of *dsx*, which appears to have similar  
214 effects on color and upper lamina morphology but does not impact scale shape. To investigate the  
215 extent to which *Antp* expression maps to silver scales, we examined the expression of *Antp* in 24-  
216 hour male and female pupal wings. *Antp* protein was visible in punctate nuclei in the forewing  
217 (Supp Fig S6A) and hindwing silver scale regions in males, especially around the future hindwing  
218 gland (Supp Fig S6C), and also in female wings at homologous locations (Supp Fig S6B, D). *Antp*  
219 protein expression was lower in the grey-silver scales on male hindwings (Supp Fig S6C). This  
220 pattern on male hindwings was especially clear in a 48-hour pupal hindwing (Supp Fig S7). These  
221 results indicate that *Antp* protein maps precisely to the area where silver scales develop on both  
222 wings.

223

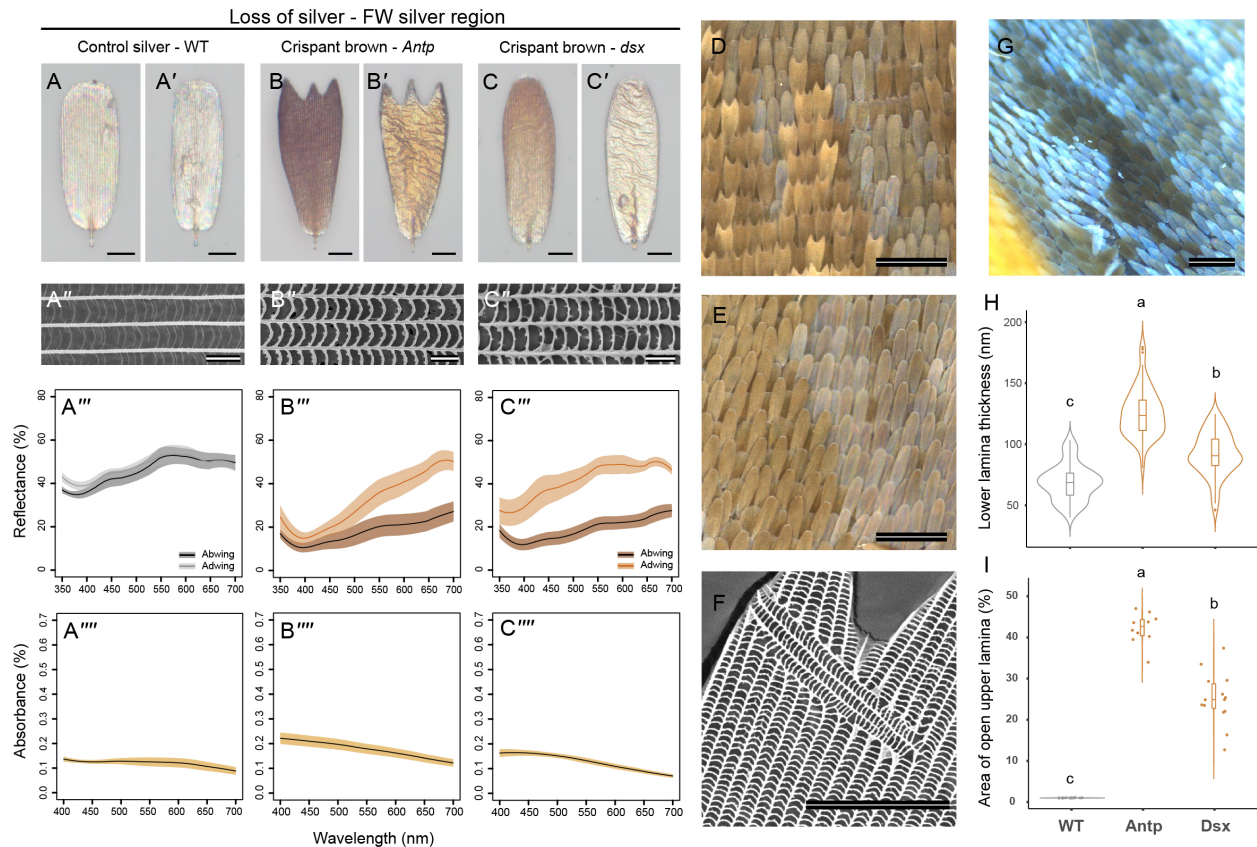

225 **Figure 2: Characterization of the ultrastructure and pigmentation of the silver to brown**  
 226 **scales in *Antp* and *dsx B. anynana* crispants.** Optical microscopy images of the abwing (A-C)  
 227 and adwing (A'-C') surfaces, SEM images of the abwing surface (A''-C''), reflectance (A'''-C''')  
 228 and absorbance spectra (A''''-C''') of the WT forewing control silver scales and the mutant brown  
 229 scales of *Antp* and *dsx* crispants respectively. (D) Mosaic scale phenotype in *Antp* crispant  
 230 forewing illustrating the mutant brown scales with dentate sculpting in the distal tips. (E) Mosaic  
 231 scale phenotype in *dsx* crispant forewing illustrating the mutant brown scales with rounded distal  
 232 tips. (F) SEM image of an *Antp* crispant forewing brown scale showing a nearly orthogonal ridge  
 233 and crossrib orientation in the midst of the normal ridge and crossrib orientation parallel to the  
 234 scale. These variations always occur at the distal tips of the crispant scales (N=4). (G) Mosaic scale  
 235 phenotype in male *Antp* crispant hindwing illustrating the mutant brown scales with dentate  
 236 sculpting in the distal tips. (H) Violin plots of the lower lamina thicknesses of the control silver  
 237 scales and the crispant brown scales of *Antp* and *dsx* crispants (I) Total area of open upper lamina  
 238 of the different control and mutant scales. Boxplots show the median, inner and outer quartiles and  
 239 whiskers up to 1.5 times the inter-quartile range. Means sharing a letter are not significantly

240 different (Tukey-adjusted comparisons). Scale bars: A,A'-C,C' and F are 20  $\mu\text{m}$ , A''-C'' are 2  $\mu\text{m}$ ,  
241 D, E,G are 200  $\mu\text{m}$ .

242

243

244 **Ectopic silver scales gain an upper lamina, decrease the thickness of their lower lamina and**  
245 **lose pigmentation**

246 We next investigated the ectopic forewing silver scales produced in the *apA* and *Ubx* crispants by  
247 the transformation of non-reflective brown scales (Fig 1A). We characterized both ectopic silver  
248 and gland scale types in *apA* crispants but only the ectopic silver scale type in the single *Ubx*  
249 crispant due to size limitation of the mutant clone in that individual. Ectopic silver scales in both  
250 *apA* and *Ubx* crispants looked similar to wildtype silver scales, including changes in cell shape  
251 (Fig 3). The *Ubx* crispant scales exhibited an extensive transformation, from scalloped brown  
252 scales to rounded silvery scales (Fig 3D, E), while the *apA* crispant scales changed primarily in  
253 color and less extensively in shape (Fig 3A-C). The abwing and adwing surfaces of the ectopic  
254 scales were metallic silvery thin films (Fig 3B, C, E). These scales were dramatically different  
255 from the control brown scales from the same crispant regions which were brown in color from the  
256 abwing side (Fig 3A, D) and had a bronze-golden adwing thin film (Fig 3A', D'). Reflectance  
257 spectra corresponded with the optical images, with the silver scales reflecting broadly (Fig 3A'''-  
258 E'''). Ectopic metallic scales of both *apA* and *Ubx* crispants also lost pigmentation as compared to  
259 the control brown scales, though there was variation between the different scale types (Fig 3A''''-  
260 E''').

261

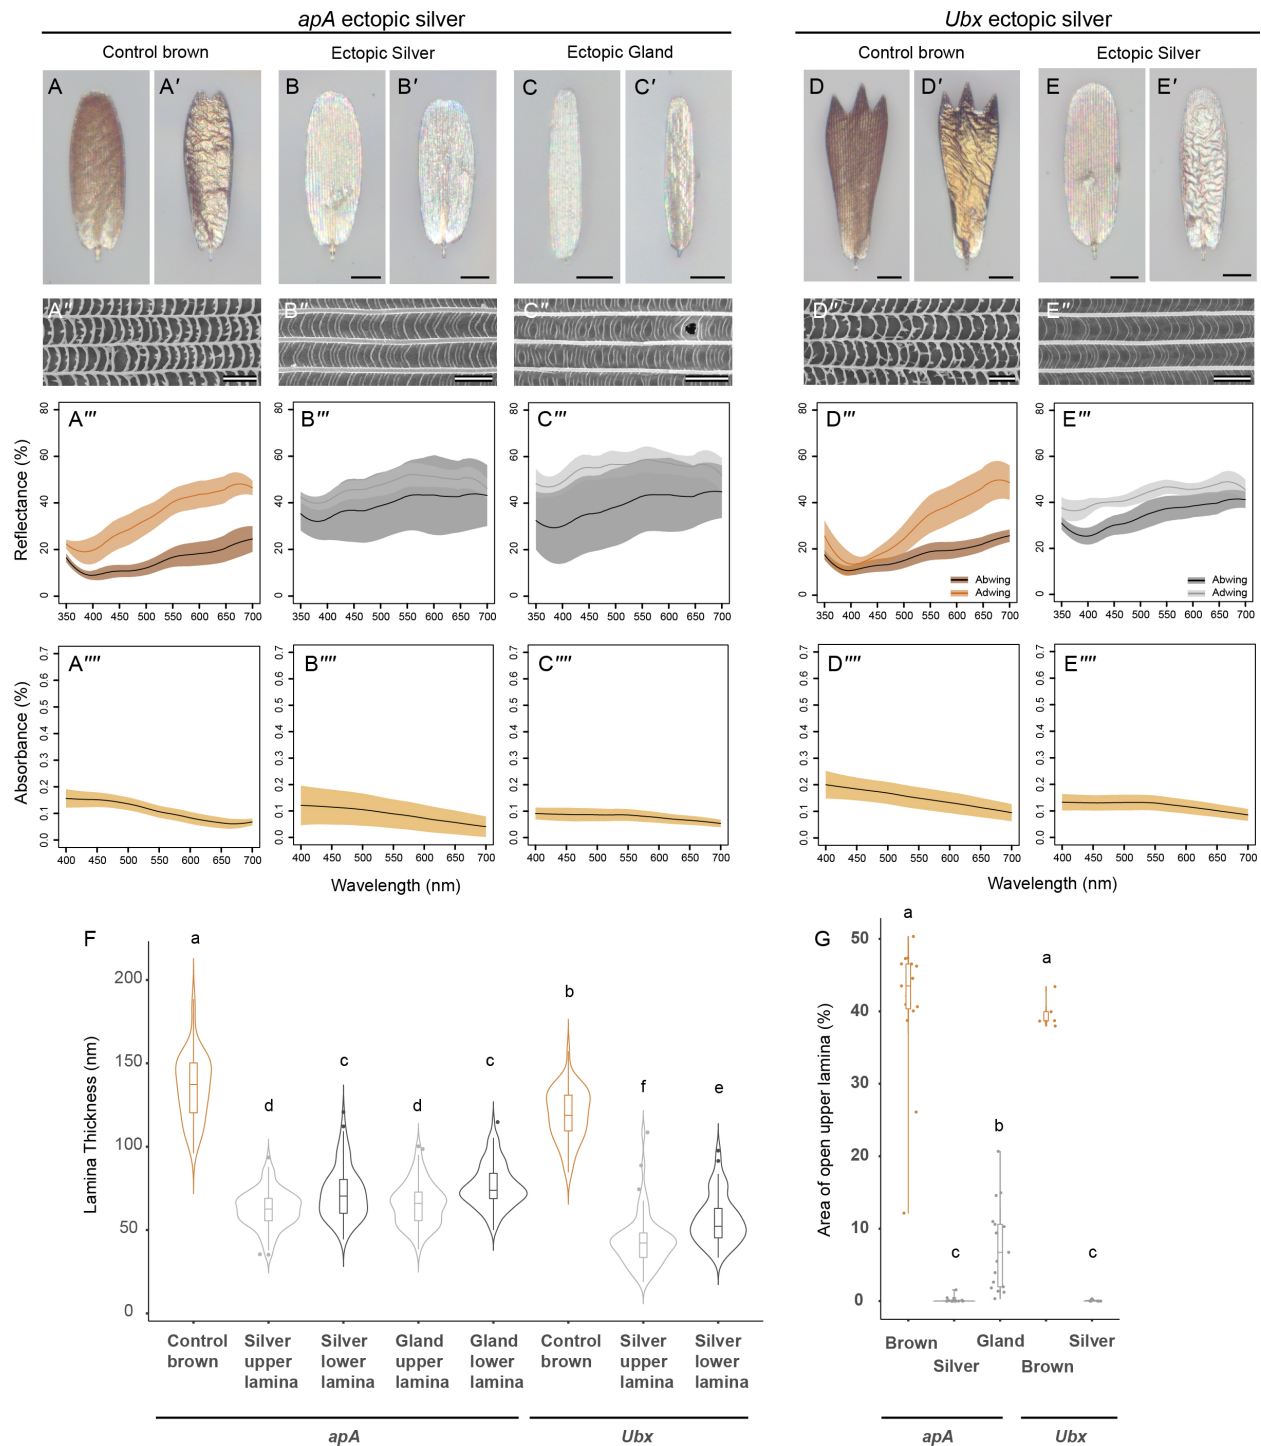

263 **Figure 3: Characterization of ectopic silver scale ultrastructure and pigmentation in *apA* and**  
 264 ***Ubx B. anynana crispants*.** Optical microscopy images of the abwing (A-E) and adwing (A'-E')  
 265 surfaces, SEM images of the abwing surface (A''-E''), reflectance (A'''-E''') and absorbance spectra  
 266 (A''''-E''') of the *apA* forewing control brown scales, ectopic silver and gland scales and the *Ubx*  
 267 hindwing control brown scales and ectopic silver scales respectively. The control scales for these

268 crispants are from the same wings as the ectopic scales, close to the mosaic crispant patches. (F)  
269 Violin plots of the upper and lower lamina thickness of the control brown scales and the ectopic  
270 silver and gland scales of *apA* and *Ubx* crispants. (G) Area of open upper lamina of the different  
271 control and ectopic scales. Boxplots show the median, inner and outer quartiles and whiskers up  
272 to 1.5 times the inter-quartile range. Means sharing a letter are not significantly different (Tukey-  
273 adjusted comparisons). Scale bars: A,A'-E,E' are 20  $\mu\text{m}$  and A''-E'' are 2  $\mu\text{m}$ .

274

275

276 Structural modifications accompanying brown to silver scale transformations, in *apA* and *Ubx*  
277 crispants, were opposite to those seen when silver scales became brown. Ectopic silver scales  
278 gained a closed upper lamina and an enclosed air layer, reduced their lower lamina thickness, and  
279 lost pigmentation in comparison to control brown scales (Fig 3A''-E'', F, G). The upper lamina  
280 transformation was complete for the *apA* and *Ubx* silver scale types, whereas many of the *apA*  
281 ectopic gland scales exhibited a partial transformation, having a significantly greater percentage  
282 of upper lamina open (Posthoc tests from LME, adjusted p-values <0.01; Supplementary Tables  
283 S1,2) (Fig 3G). All ectopic silver scale types exhibited a significant decrease in lower lamina  
284 thickness when compared to the control brown scales (Posthoc tests from LME: adjusted P-values  
285 <0.0001; Supplementary Tables S3,4). Similar to the wildtype forewing silver scales, the ectopic  
286 forewing silver scales in both *apA* and *Ubx* crispants also had thicker lower laminae as compared  
287 to the respective upper laminae (Supplementary Tables S3,4). The greater variability in the  
288 ultrastructural transformations and pigmentation of the *apA* ectopic silver scale types explains the  
289 greater variability in the abwing reflectance spectra measured from these crispant scales (Fig 3B''',  
290 C''').

291

### 292 ***apA*, *dsx* and *optix* promote silver coloration via the gain of an upper lamina, decrease in** 293 **lower lamina thickness and loss of pigmentation**

294 On the hindwings, crispants of *apA*, *dsx*, and *optix* showed loss of metallic silver scales and  
295 transformation of these scales into brown scales. For *apA* these are the exact opposite phenotypes  
296 from those observed on the forewing, where *apA* transformed brown scales into ectopic silver  
297 scales. In *apA* and *dsx* crispants, hindwing silver and grey-silver scales were transformed into  
298 brown scales (Fig 4A-F) while in the *optix* crispants, the coupling silver scales became brown

299 scales (Fig 4G-H). Brown crispant scales of *apA* individuals exhibited a dentate morphology while  
300 those in *dsx* individuals exhibited some variation in morphology, from rounded scales in the silver  
301 region to sometimes dentate scales in the grey-silver region. Brown *optix* coupling scales displayed  
302 a noticeable change in morphology from the characteristic trowel-head shape of the control scales  
303 to an oblong morphology in the crispant brown scales (Fig 4G-H). Reflectance spectra reflected  
304 the change in coloration (Fig 4A''' – H'''). In all instances of transformation, the adwing sides of  
305 the crispant scales were thin films reflecting a deep bronze-golden color instead of the silver to  
306 gold reflectance of the wildtype control scales (Fig 4A'-H'). In addition, in line with the silver to  
307 brown transformation, there was an increase in pigmentation in most scales (Fig 4A''''-C''', G'''-  
308 H'''), except in the grey-silver region, where crispant brown scales, in both *apA* and *dsx* crispants,  
309 had decreased pigmentation as compared to the controls (Fig 4D''''-F'''), despite control scales  
310 displaying a lot of variation in pigmentation levels (Fig 4 D''').

311  
312 Similar to the forewing silver to brown transformations, crispant brown scales on the hindwing,  
313 produced by all three genes, also exhibited a loss of the upper lamina (Fig 4A''-H'', J,  
314 Supplementary Tables S1,2). This was not a clean morphological change, with many scales  
315 exhibiting a gradualism in transformation, often having remnants of the lamina attached to the  
316 crossribs and ridges (Fig 4A''-H'', J). The lower lamina thickness of these scales also increased  
317 compared to wildtype silver controls (Posthoc tests from LME, adjusted P-values <0.001;  
318 Supplementary Tables S3,4). Both *apA* and *dsx* hindwing brown scales in the silver and grey-silver  
319 regions had significantly thicker lower laminas than control scales, while there was no change of  
320 lamina thickness in *optix* crispant brown scales (Fig 4I, Supplementary Tables S3,4).

321

322

323

324

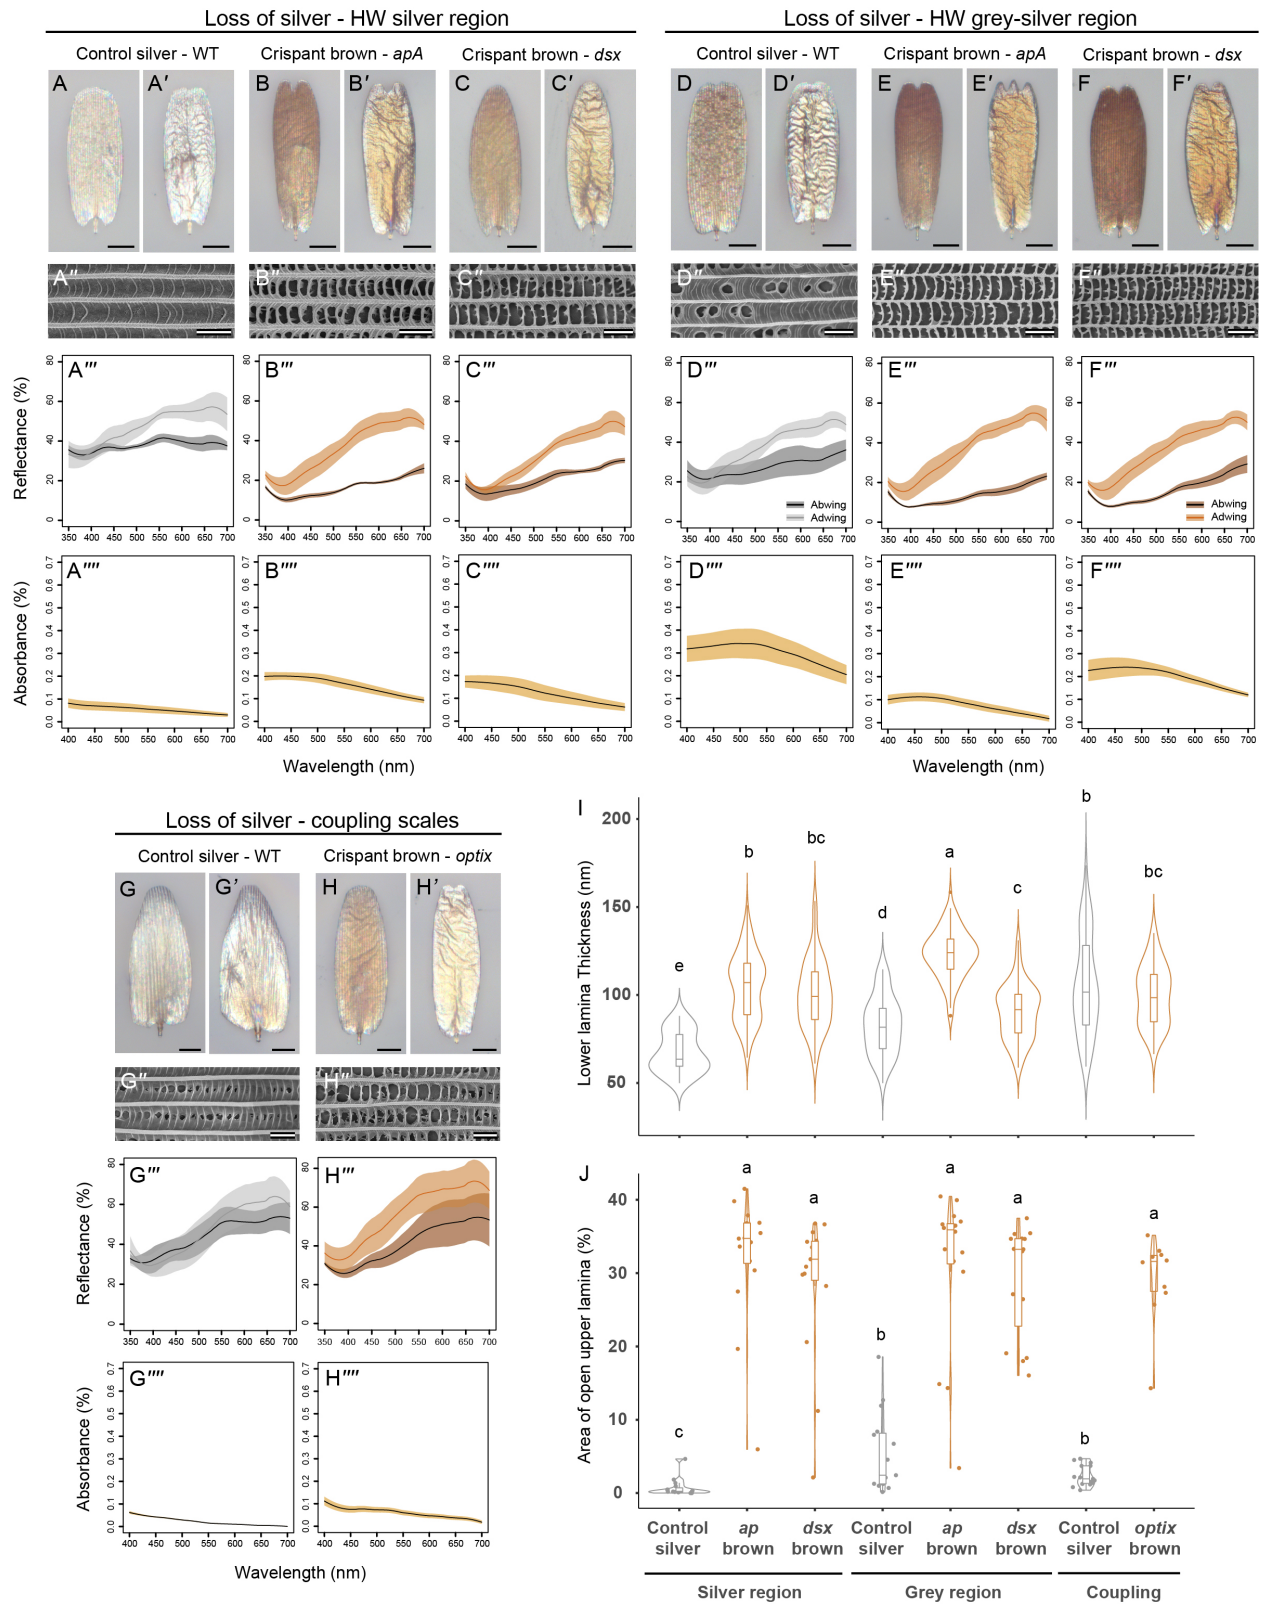

326 **Figure 4: Characterization of the ultrastructure and pigmentation of transformed silver to**  
 327 **brown scales in *apA*, *dsx* and *optix* *B. anynana* crispants. Optical microscopy images of the**

328 abwing (A-H) and adwing (A'-H') surfaces, SEM images of the abwing surface (A''-H''),  
329 reflectance (A'''-H''') and absorbance spectra (A''''-H''''') of the control WT silver scales and  
330 transformed crispant brown scales in the hindwing silver region (A-C), the hindwing grey-silver  
331 region (D-F) and the hindwing coupling scales (G-H). The control scales are WT silver scales from  
332 homologous regions on the wing. (I) Violin plots of the lower lamina thicknesses of control WT  
333 silver scales and the crispant brown scales of *apA*, *dsx* and *optix* crispants (G) Total area of open  
334 upper lamina of the different control and crispant brown scales. Boxplots show the median, inner  
335 and outer quartiles and whiskers up to 1.5 times the inter-quartile range. Means sharing a letter are  
336 not significantly different (Tukey-adjusted comparisons). Scale bars: A,A'-H,H' are 20  $\mu\text{m}$  and  
337 A''-H'' are 2  $\mu\text{m}$ .

338

## 339 **Discussion and conclusion**

### 340 **Metallic scales in *Bicyclus anynana* are undulatory broadband reflectors**

341 We characterized five different metallic reflectors in *B. anynana* butterflies. Four out of the five  
342 scale types are present only in males, associated with the androconial regions that produce and  
343 secrete sex pheromones, while the fifth, the coupling scales, are found in both sexes near the base  
344 of the wings. All five metallic scale types investigated in this study produced broadband silver  
345 reflectance from an undulatory thin film achieved by the closure of the “open” windows present  
346 in typical wing scales. The sandwiched air gap layer of varying thickness between two chitinous  
347 laminae reflects spatially different wavelengths of light, resulting in a specular metallic color at  
348 the far-field due to additive color mixing. Such an ultrastructural modification involving the gain  
349 of a contiguous upper lamina leading to metallic coloration has been well-documented in multiple  
350 butterfly species across different families (21, 24), suggesting that the convergent evolution of  
351 metallic reflectors in butterflies can occur repeatedly with a few simple modifications to the basic  
352 scale architecture. Our modeling demonstrates that while butterflies can achieve broadband  
353 metallic colors by tuning just the lower lamina, the three-layer system comprising a sandwiched  
354 air layer between chitinous laminae is substantially brighter, perhaps explaining its repeated  
355 evolutionary origin (24). Moreover, the varying thickness of the air gap was the most important  
356 structural parameter to produce a nearly flat (smoothed out) broadband reflectance, while the upper  
357 and lower lamina thicknesses were more optimized for enhancing the broadband reflectivity.  
358 Pigmentation levels were low overall but varied among the different silver scales along with slight



359 variations in the total open area of the upper lamina. This intriguingly suggests that the amount of  
360 pigmentation may be directly impacting the formation of the upper lamina, as previously  
361 demonstrated in other scale types of *B. anynana* (33). We were unable to characterize the exact  
362 pigment composition in these scales, but the absorbance spectra of the grey-silver scales suggests  
363 that the pigments are not purely melanins but could instead be a combination of melanins and  
364 additional pigments such as ommochromes (29).

365

366 **Each of five genes that led to gains and losses of metallic reflectance also changed**  
367 **pigmentation levels and scale ultrastructure**

368 We discovered that disruptions to the five genes investigated (*Antp*, *dsx*, *apA*, *Ubx* and *optix*) lead  
369 to simultaneous change in three scale features, suggestive of a switch-like or pleiotropic role for  
370 these genes in determining the development of metallic scales. Transformation of metallic silver  
371 scales into brown, non-reflecting scales in *Antp*, *dsx*, *apA* and *optix* crispants involved loss of an  
372 upper lamina, gain in pigmentation levels, and an increase in lower lamina thickness. This was  
373 generally true except in the case of the grey-silver scales of the hindwing where transformation to  
374 brown scales led to a decrease in pigmentation. Likewise, gain of silver reflectance in scales of  
375 *apA* and *Ubx* crispants was accompanied by the appearance of a continuous upper lamina that  
376 closed the windows of the typical scale ground plan, a decrease in pigmentation levels, and a  
377 decrease in the thickness of the lower lamina. The breadth of variation seen in individual crispant  
378 brown scales and ectopic silver scales was potentially due to incomplete knockouts, and variation  
379 in the protein function of each mutant allele. This was especially the case of *apA* crispants, possibly  
380 due to the incomplete knockout of these genes in individual scales cells.

381

382 The gain and loss of an upper lamina with concurrent changes in the thickness of the lower lamina  
383 suggests a possible conservation of total chitin production within a cell, but variable deposition  
384 between the two laminae. There is some evidence for this in the forewing silver and gland scales  
385 but not in the hindwing silver scale types. The summed thicknesses of the two laminae in the  
386 wildtype forewing silver scales and ectopic silver scales was similar to the lower lamina thickness  
387 of the forewing control brown scales and crispant brown scales. Though there is some indication  
388 of the conservation of chitin production within a single cell, testing this proposition in the future  
389 will require finer measurements of chitin production within different scale color types. Further,

390 Matsuoka and Monteiro (33) speculated that downstream effector genes such as *yellow* could affect  
391 cuticle polymerization around crossribs to create windows because *yellow* *B. anynana* crispant  
392 black and brown scales exhibited an upper lamina covering the windows. Given the low amounts  
393 of pigmentation seen in the different silver scale types, it is possible that the gene *yellow* is not  
394 highly expressed in silver scales, mirroring *yellow* crispant scales. *yellow* would then be a potential  
395 downstream target, that would be repressed by the silver scale GRN. This hypothesis could be  
396 tested by measuring levels of *yellow* expression in the different colored vs silver scales of *B.*  
397 *anynana*, as well as in crispant individuals during development.

398

### 399 ***Antp* is a selector gene for rounded scales and acts through DsxM to determine silver scales**

400 Investigation of the mutant brown scales in *Antp* crispants uncovered an important role for this  
401 gene in determining a rounded scale morphology. Scales on the posterior ventral forewing and  
402 anterior dorsal hindwing of both sexes of *B. anynana*, a region where *Antp* is strongly expressed  
403 (Supp Fig S6), normally have rounded distal ends, appearing silver in males and shades of brown  
404 in females. In *Antp* crispants, the rounded scales developed serrated distal tips in both sexes,  
405 concurrent with the transformation of silver to brown color in males only. These crispant brown  
406 scales with serrated edges were similar to the scales usually found on the rest of the ventral  
407 forewing (Supp Fig S5A, B) or dorsal hindwing (Supp Fig S5C, D), indicating that *Antp* is essential  
408 for converting a serrated distal scale edge into a rounded scale. Furthermore, this result suggests  
409 that *Antp* acts upstream of *dsx* in the forewing and hindwing silver scale GRN because male *dsx*  
410 crispants exhibited a more restricted silver to brown transformation, still displaying the rounded  
411 distal edge of a typical silver scale, instead of the dentate morphology. We propose that the protein  
412 *Antp* activates *dsx* in the posterior ventral forewing or anterior dorsal hindwing (Fig 5). In females,  
413 *Antp* would lead to the production of the DsxF protein splice variant, resulting in brown scales  
414 with a rounded morphology since DsxF has no function in silver scale development (34). In males,  
415 *Antp* would activate DsxM protein splice variant, which leads to the development of rounded silver  
416 scales in both regions (34). Interestingly, the metallic silver scales on male forewing and hindwings  
417 fall into two populations with different aspect ratios: the shorter silver scales covering most of the  
418 region and the longer, thin gland scales that cover only the underlying pheromone glands (38).  
419 The spatially defined occurrence of the long, thin gland scales is likely specified by the spatially  
420 restricted expression of some unknown gland-specific gene, downstream of DsxM in the silver

421 scale GRN.

422

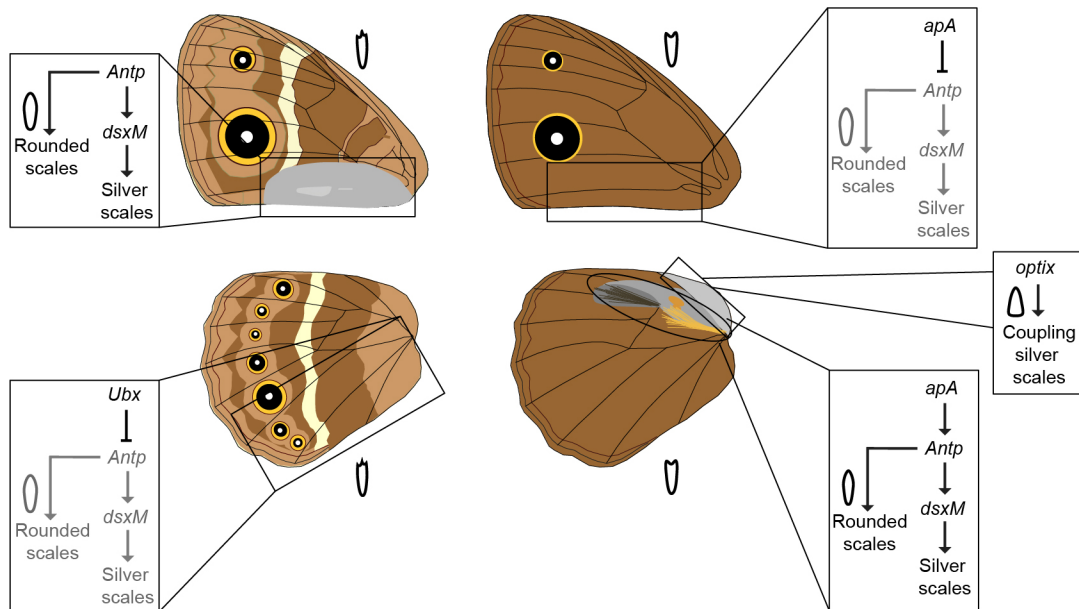

424 **Figure 5: Proposed gene regulatory network (GRN) controlling silver scale development**  
425 **and scale shape in different wing regions of a male *B. anynana*.** For each wing region, GRNs  
426 are indicated within boxes. The scale schematics inside the boxes represent the scale shape when  
427 the 'rounded scales' part of the network is active (dark lines). Repressed parts of the network are  
428 in grey. The scale schematics outside the boxes, next to each wing surface, reflect the scale shape  
429 generally found on that surface otherwise.

430

431

432 The unusual ridge and crossrib orientation, almost orthogonal to the normal orientation, seen in a  
433 few *Antp* crispant brown scales, hinted at a role for this gene in ridge patterning during the early  
434 stages of scale development. In developing scales, the positioning and orientation of ridges is  
435 determined by the spacing of F-actin filaments that emanate from the base of the scale, parallel to  
436 the scale's long axis (39, 40). The disrupted and abrupt change in orientation of the ridges and  
437 their corresponding crossribs in the *Antp* crispant scales suggests a potential disruption of the  
438 orientation of F-actin filaments. Based on the distal domain of occurrence of the unusual ridge  
439 patterns, along with the rounded to serrated distal edge change seen in *Antp* crispants, we speculate  
440 that *Antp* regulates the distal expression of an unknown factor, possibly a cytoskeletal component,  
441 that determines scale morphology and ridge/crossrib orientation. Hox genes such as *Abd-B* have

442 been identified to activate cytoskeletal components like cadherins in the development of posterior  
443 spiracles of *Drosophila* (41). Furthermore, *Ubx* directly regulates cytoskeletal components such  
444 as actin and contributes to cytoskeletal reorganization in haltere cells (42). In that context, our  
445 results identify a novel post-embryonic role of a Hox gene in the determination of the shape of a  
446 single cell. How *Antp* directs scale shape and ridge orientation, and which genes are its downstream  
447 targets, remains an exciting avenue for future work.

448

#### 449 **The silver scale GRN is modulated in various ways across the fore- and hindwings**

450 The appearance of forewing silver and gland scales in ectopic dorsal locations on the forewings of  
451 *apA* crispants and ventral locations on the hindwings of *Ubx* crispants, lead us to propose that both  
452 genes are repressing the forewing silver scale GRN (Fig 5). *Ubx* is a well-known homeotic gene  
453 whose expression is restricted to the hindwings of many insects and which functions in  
454 determining hindwing shape and color patterns in butterflies (36, 43–45). Knockout of *Ubx* in *B.*  
455 *anymana* converts hindwing patterns into forewing patterns (36). Since *Antp* is a top regulator of  
456 the silver scale GRN, these results suggest that *Ubx* represses *Antp* expression on the ventral  
457 hindwings. Recent work showed that upon loss of *Ubx*, *Antp* is strongly expressed on the  
458 hindwings (Matsuoka and Monteiro, in prep). We propose that the silver scales observed on the  
459 ventral hindwing of the *Ubx* male crispant resulted from the de-repression of *Antp* in that region,  
460 followed by the activation of *DsxM*, and the development of rounded silver scales typical of the  
461 ventral forewing (Fig 5). Along similar lines, *apA* is a dorsal surface-specific gene and in *apA*  
462 crispants, forewing ventral silver and gland scales appeared on the dorsal forewing surface (35).  
463 This is again suggestive of *apA* repressing *Antp* on the dorsal forewing surface. Upon de-  
464 repression, *Antp* activates *DsxM* and this leads to the development of the metallic silver scales on  
465 the dorsal surface of males (Fig 5). This regulatory circuit appears to be different from the  
466 development of somatic mesodermal muscle tissues in *Drosophila* where *Antp* directly and  
467 positively regulates *apterous* (46). Our proposed forewing silver scale GRN thus identifies *Antp*  
468 as a top regulator, directing metallic scale development via *dsx*. *apA* and *Ubx* are repressors of this  
469 network on the dorsal forewings and ventral hindwings, respectively (Fig 5). However, the  
470 molecular basis of the direct or indirect regulatory interactions between these different genes  
471 remains to be identified.

472

473 On the hindwings, the silver and grey-silver scale GRN retains the same topology, with *Antp*  
474 determining a rounded scale shape and acting via *dsx* to determine silver scale development (Fig  
475 5). In contrast to its repressive role on the dorsal forewing silver scale GRN, *apA* acts as an  
476 activator of the GRN on the hindwings. The difference in levels of Antp protein expression  
477 between the silver and grey-silver scale regions suggests that varying thresholds of this protein are  
478 functionally relevant in the two scale types. Lastly, *optix* is necessary to create a silver coupling  
479 scale but it also modulates scale shape from an oblong to a trowel-shaped morphology. Its  
480 expression in coupling scales of other butterflies such as *Heliconius* implicates a conserved role  
481 for *optix* in the development of trowel-shaped coupling scales (47, 48).

482

483 In conclusion, this study identified the structural and photonic origin of broadband silver coloration  
484 by comparing silver scales in WT and crispants for five genes in the butterfly *B. anynana*. Based  
485 on the epistasis between the investigated genes, we proposed a GRN for metallic scale  
486 development in butterflies. We identified *Antp* as an important top-level gene in the regulatory  
487 network for silver scale development and a novel role for this Hox gene in determining the shape  
488 of single cells.

489

## 490 **Materials and methods**

### 491 Crispant individuals and sampled scale types

492 All crispant individuals used in this study were previously generated in our lab by CRISPR Cas9-  
493 mediated gene editing in *B. anynana*. *B. anynana* crispants were for the following genes: *apterous*  
494 *A* (*apA*) (35), *Ultrabithorax* (*Ubx*) (36), *doublesex* (*dsx*) (34), *Antennapedia* (*Antp*) (36) and *optix*  
495 (37). Five different silver scale types were sampled, namely, the silver and the gland scales on the  
496 androconial patch of male ventral forewings, the silver and grey-silver scales near the androconial  
497 patches of male dorsal hindwings and the coupling scales near the base of the dorsal hindwing in  
498 females (Fig 1A).

499

### 500 Scanning electron microscopy

501 Five to six scales from different regions of the crispant individuals (Fig 1A) were individually  
502 mounted onto carbon tape and sputter coated with gold using a JFC-1100 Fine Coat Ion Sputter  
503 (JEOL Ltd. Japan). Images were obtained using a JEOL JSM-6510LV scanning electron

504 microscope (JEOL Ltd. Japan). For the wildtype, *apA* and *dsx* crispants, three different individuals  
505 were sampled for each case. Two individuals were sampled for *Antp* and *optix* crispants while only  
506 one crispant was obtained for *Ubx*.

507

#### 508 Percentage area of open upper lamina measurements

509 From the SEM images, the percentage of area of open upper lamina was calculated using ImageJ  
510 1.52a (Java 1.8.0\_112) (49). A 20  $\mu\text{m}^2$  (10  $\mu\text{m}^2$  for gland scales) region of interest was defined  
511 approximately at the center of the scale and the region outside cleared. A thresholding was applied  
512 based on the values of the bright (ridge and crossribs) and dark (windows) regions of the SEM.  
513 The dark areas were selected and added to the ROI Manager in ImageJ using the Analyze Particles  
514 function. The selected regions were combined using the OR function in the ROI Manager. The  
515 combined area of the open upper lamina within the defined regions was measured and converted  
516 into a percentage.

517

#### 518 Focused ion beam scanning electron microscopy (FIB-SEM)

519 FIB-SEM was used to measure the lower lamina, upper lamina, and air gap thicknesses for all  
520 scale types in our analysis and corrected for tilted perspective (measured thickness /  $\sin 52^\circ$ ).  
521 Briefly, samples were prepared by sputter-coating with platinum to increase conductivity. The  
522 scales were milled using a gallium ion beam on a FEI Versa 3D with the following settings: beam  
523 voltage  $-8\text{kV}$ , beam current  $-12\text{pA}$  at a  $52^\circ$  tilt. Image acquisition was performed in the same  
524 equipment with the following settings: beam voltage  $-5\text{kV}$ , beam current  $-13\text{pA}$ . Milling was  
525 done at the center of each scale. Thickness measurements were done in ImageJ. For each scale  
526 type, ten measurements were taken per scale with 3-16 scales sampled from 1-2 individuals.  
527 Measurements were made along most of the lower lamina which is uniform, excluding the region  
528 around the ridge base, where the thickness is highly variable.

529

#### 530 Optical imaging and UV-VIS-NIR microspectrophotometry

531 Light microscope images of individual scales were recorded using the 20X lens of a uSight-2000-  
532 Ni microspectrophotometer (Technospex Pte. Ltd., Singapore) and a Touptek U3CMOS-05  
533 camera. Scales were individually mounted on a glass slide or in a refractive index matching  
534 medium (clove oil) and multiple images at different focal planes (z-stack) were obtained. Stacking

535 was done in Adobe Photoshop v 22.5.1 (Adobe, California, USA).

536

537 Normal-incidence UV-VIS-NIR reflectance spectra of scales were acquired using the same  
538 microspectrophotometer setup but with a 100x objective. Spectra with usable range between 335-  
539 950 nm were collected using a high NA 100x objective from a ~2  $\mu\text{m}$  sized spot (100 ms integration  
540 time, 10x averaging) and calibrated using an Avantes WS-2 reference tile made of white diffuse  
541 polytetrafluoroethylene. Individual scales were mounted on a black carbon tape and illuminated  
542 with a Mercury-Xenon lamp (ThorLabs Inc., New Jersey, USA). Measurements were taken from  
543 both abwing and adwing surfaces. For each scale type, measurements from five to ten individual  
544 scales from one individual were averaged. Absorbance spectrum was measured for individual  
545 scales immersed in a refractive index matching liquid (clove oil) using a 20X objective. Six to  
546 eight individual measures from one individual were averaged for each crispant type and wildtype.  
547 Analysis and spectral plots were done in R Studio 1.4.1106 with R 4.0.4 (50) using the R-package  
548 *pavo* (v 2.7) (51).

549

### 550 **Acknowledgements**

551 We thank Tirtha Das Banerjee for providing us the *optix* crispants, Yuji Matsuoka for providing  
552 us the *Antp* and *Ubx* crispants and Emilie Dion for helpful discussions on the statistics. We thank  
553 Sree Vaishnavi Sundararajan and Gianluca Greci (MBI) for access and help with SEM, and the  
554 Pennycook group (MSE) for use of FIB-SEM. This research was supported by the National  
555 Research Foundation (NRF) Singapore under the Competitive Research Programme (NRF-CRP20-  
556 2017-0001 Award) and the National University of Singapore.

557

### 558 **Author Contributions**

559 A.P and A.M conceived and designed the study. A.P, C.F and V.S collected the spectral  
560 measurements. A.P and C.F collected the SEM data and C.F collected the FIB-SEM data. V.S  
561 performed the theoretical modeling. A.P analyzed all the data and did all the immunostainings.  
562 A.P wrote the manuscript with inputs from all the authors.

563

### 564 **References**

565 1. M. F. Land, The physics and biology of animal reflectors. *Prog. Biophys. Mol. Biol.* **24**,

- 566 75–106 (1972).
- 567 2. A. E. Seago, P. Brady, J.-P. Vigneron, T. D. Schultz, Gold bugs and beyond: A review of  
568 iridescence and structural colour mechanisms in beetles (Coleoptera). *J. R. Soc. Interface*  
569 **6 Suppl 2**, S165–S184 (2009).
- 570 3. A. C. Neville, Metallic gold and silver colours in some insect cuticles. *J. Insect Physiol.*  
571 **23**, 1267–1274 (1977).
- 572 4. E. J. Denton, M. F. Land, Mechanism of reflexion in silvery layers of fish and  
573 cephalopods. *Proc. R. Soc. London. Ser. B, Biol. Sci.* **178**, 43–61 (1971).
- 574 5. A. L. Holt, A. M. Sweeney, S. Johnsen, D. E. Morse, A highly distributed Bragg stack  
575 with unique geometry provides effective camouflage for Loliginid squid eyes. *J. R. Soc.*  
576 *Interface* **8**, 1386–1399 (2011).
- 577 6. D. Gur, *et al.*, The Dual Functional Reflecting Iris of the Zebrafish. *Adv. Sci.* **5**, 1800338  
578 (2018).
- 579 7. E. J. Denton, Review lecture: on the organization of reflecting surfaces in some marine  
580 animals. *Philos. Trans. R. Soc. London. Ser. B, Biol. Sci.* **258**, 285–313 (1970).
- 581 8. S. Johnsen, Hide and Seek in the Open Sea: Pelagic Camouflage and Visual  
582 Countermeasures. *Ann. Rev. Mar. Sci.* **6**, 369–392 (2014).
- 583 9. H.-J. Wagner, R. H. Douglas, T. M. Frank, N. W. Roberts, J. C. Partridge, A Novel  
584 Vertebrate Eye Using Both Refractive and Reflective Optics. *Curr. Biol.* **19**, 108–114  
585 (2009).
- 586 10. B. D. Wilts, P. Pirih, K. Arikawa, D. G. Stavenga, Shiny wing scales cause spec(tac)ular  
587 camouflage of the angled sunbeam butterfly, *Curetis acuta*. *Biol. J. Linn. Soc.* **109**, 279–  
588 289 (2013).
- 589 11. D. G. Stavenga, H. L. Leertouwer, D. C. Osorio, B. D. Wilts, High refractive index of  
590 melanin in shiny occipital feathers of a bird of paradise. *Light Sci. Appl.* **4**, e243–e243  
591 (2015).
- 592 12. S. N. Nan, *et al.*, Keeping cool: Enhanced optical reflection and radiative heat dissipation  
593 in Saharan silver ants. *Science (80-. )*. **349**, 298–301 (2015).
- 594 13. P. Vukusic, J. R. Sambles, Photonic structures in biology. *Nature* **424**, 852–5 (2003).
- 595 14. S. Kinoshita, S. Yoshioka, J. Miyazaki, Physics of structural colors. *Reports Prog. Phys.*  
596 **71** (2008).



- 597 15. M. Srinivasarao, Nano-Optics in the Biological World: Beetles, Butterflies, Birds, and  
598 Moths. *Chem. Rev.* **99**, 1935–1962 (1999).
- 599 16. a R. Parker, D. R. McKenzie, M. C. J. Large, Multilayer reflectors in animals using green  
600 and gold beetles as contrasting examples. *J. Exp. Biol.* **201**, 1307–1313 (1998).
- 601 17. E. D. Finlayson, L. T. McDonald, P. Vukusic, Optically ambidextrous circularly polarized  
602 reflection from the chiral cuticle of the scarab beetle *Chrysina resplendens*. *J. R. Soc.*  
603 *Interface* **14** (2017).
- 604 18. R. A. Steinbrecht, Fine structure and development of the silver and golden cuticle in  
605 butterfly pupae. *Tissue Cell* **17**, 745–762 (1985).
- 606 19. R. a. Steinbrecht, W. Mohren, H. K. Pulker, D. Schneider, Cuticular Interference  
607 Reflectors in the Golden Pupae of Danaine Butterflies. *Proc. R. Soc. B Biol. Sci.* **226**,  
608 367–390 (1985).
- 609 20. D. R. McKenzie, Y. Yin, W. D. McFall, Silvery fish skin as an example of a chaotic  
610 reflector. *Proc. R. Soc. London. Ser. A Math. Phys. Sci.* **451**, 579–584 (1995).
- 611 21. P. Vukusic, R. Kelly, I. Hooper, A biological sub-micron thickness optical broadband  
612 reflector characterized using both light and microwaves. *J. R. Soc. Interface* **6 Suppl 2**,  
613 S193-201 (2009).
- 614 22. C. Kilchoer, U. Steiner, B. D. Wilts, Thin-film structural coloration from simple fused  
615 scales in moths. *Interface Focus* **9** (2019).
- 616 23. L. D’Alba, B. Wang, B. Vanthournout, M. D. Shawkey, The golden age of arthropods:  
617 Ancient mechanisms of colour production in body scales. *J. R. Soc. Interface* **16** (2019).
- 618 24. A. Ren, *et al.*, Convergent Evolution of Broadband Reflectors Underlies Metallic  
619 Coloration in Butterflies . *Front. Ecol. Evol.* **8**, 206 (2020).
- 620 25. A. Dolinko, *et al.*, Analysis of the optical properties of the silvery spots on the wings of  
621 the Gulf Fritillary, *Dione vanillae*. *Sci. Rep.* **11**, 19341 (2021).
- 622 26. T. J. Simonsen, Comparative morphology and evolutionary aspects of the reflective under  
623 wing scale-pattern in Fritillary butterflies (Nymphalidae: Argynnini). *Zool. Anz.* **246**, 1–10  
624 (2007).
- 625 27. Z. Qingqing, *et al.*, Fossil scales illuminate the early evolution of lepidopterans and  
626 structural colors. *Sci. Adv.* **4**, e1700988 (2021).
- 627 28. B. Vanthournout, *et al.*, Springtail coloration at a finer scale: mechanisms behind vibrant

- 628 collembolan metallic colours. *J. R. Soc. Interface* **18**, 20210188 (2021).
- 629 29. B. R. Wasik, *et al.*, Artificial selection for structural color on butterfly wings and  
630 comparison with natural evolution. *Proc. Natl. Acad. Sci.* (2014)  
631 <https://doi.org/10.1073/pnas.1402770111> (August 5, 2014).
- 632 30. R. C. Thayer, F. I. Allen, N. H. Patel, Structural color in Junonia butterflies evolves by  
633 tuning scale lamina thickness. *Elife* **9**, e52187 (2020).
- 634 31. R. H. Siddique, S. Vignolini, C. Bartels, I. Wacker, H. Hölscher, Colour formation on the  
635 wings of the butterfly *Hypolimnas salmacis* by scale stacking. *Sci. Rep.* **6**, 36204 (2016).
- 636 32. L. Livraghi, *et al.*, Cortex cis-regulatory switches establish scale colour identity and  
637 pattern diversity in *Heliconius*. *Elife* **10**, 1–31 (2021).
- 638 33. Y. Matsuoka, A. Monteiro, Melanin Pathway Genes Regulate Color and Morphology of  
639 Butterfly Wing Scales. *Cell Rep.* **24**, 56–65 (2018).
- 640 34. A. Prakash, A. Monteiro, Doublesex Mediates the Development of Sex-Specific  
641 Pheromone Organs in *Bicyclus* Butterflies via Multiple Mechanisms. *Mol. Biol. Evol.* **37**,  
642 1694–1707 (2020).
- 643 35. A. Prakash, A. Monteiro, *apterous A* specifies dorsal wing patterns and sexual traits in  
644 butterflies. *Proc. R. Soc. B Biol. Sci.* (2018) <https://doi.org/10.1098/rspb.2017.2685>.
- 645 36. Y. Matsuoka, A. Monteiro, Hox genes are essential for the development of eyespots in  
646 *Bicyclus anynana* butterflies. *Genetics* **217** (2021).
- 647 37. T. Das Banerjee, S. K. Shan, A. Monteiro, *optix* is involved in  
648 eyespot development via a possible positional information mechanism. *bioRxiv*,  
649 2021.05.22.445259 (2021).
- 650 38. E. Dion, A. Monteiro, J. Y. Yew, Phenotypic plasticity in sex pheromone production in  
651 *Bicyclus anynana* butterflies. *Sci. Rep.* **6**, 1–13 (2016).
- 652 39. A. Dinwiddie, *et al.*, Dynamics of F-actin prefigure the structure of butterfly wing scales.  
653 *Dev. Biol.* **392**, 404–418 (2014).
- 654 40. C. R. Day, J. J. Hanly, A. Ren, A. Martin, Sub-micrometer insights into the cytoskeletal  
655 dynamics and ultrastructural diversity of butterfly wing scales. *Dev. Dyn.* **248**, 657–670  
656 (2019).
- 657 41. B. Lovegrove, *et al.*, Coordinated Control of Cell Adhesion, Polarity, and Cytoskeleton  
658 Underlies Hox-Induced Organogenesis in *Drosophila*. *Curr. Biol.* **16**, 2206–2216 (2006).

- 659 42. A. Pavlopoulos, M. Akam, Hox gene Ultrabithorax regulates distinct sets of target genes  
660 at successive stages of *Drosophila* haltere morphogenesis. *Proc. Natl. Acad. Sci.* **108**,  
661 2855–2860 (2011).
- 662 43. X. Tong, S. Hrycaj, O. Podlaha, A. Popadic, A. Monteiro, Over-expression of  
663 Ultrabithorax alters embryonic body plan and wing patterns in the butterfly *Bicyclus*  
664 *anyana*. *Dev. Biol.* **394**, 357–366 (2014).
- 665 44. Y. Tomoyasu, S. R. Wheeler, R. E. Denell, Ultrabithorax is required for membranous  
666 wing identity in the beetle *Tribolium castaneum*. *Nature* **433**, 643–647 (2005).
- 667 45. S. D. Weatherbee, *et al.*, Ultrabithorax function in butterfly wings and the evolution of  
668 insect wing patterns. *Curr. Biol.* **9**, 109–115 (1999).
- 669 46. M. Capovilla, Z. Kambris, J. Botas, Direct regulation of the muscle-identity gene *apterous*  
670 by a Hox protein in the somatic mesoderm. *Development* **128**, 1221–1230 (2001).
- 671 47. A. Martin, *et al.*, Multiple recent co-options of *Optix* associated with novel traits in  
672 adaptive butterfly wing radiations. *Evodevo* **5**, 1–13 (2014).
- 673 48. L. Zhang, A. Mazo-Vargas, R. D. Reed, Single master regulatory gene coordinates the  
674 evolution and development of butterfly color and iridescence. *Proc. Natl. Acad. Sci.* **114**,  
675 10707 LP – 10712 (2017).
- 676 49. C. A. Schneider, W. S. Rasband, K. W. Eliceiri, NIH Image to ImageJ: 25 years of image  
677 analysis. *Nat. Methods* **9**, 671–675 (2012).
- 678 50. R Core Team, R: A Language and Environment for Statistical Computing (2021).
- 679 51. R. Maia, H. Gruson, J. A. Endler, T. E. White, pavo 2: New tools for the spectral and  
680 spatial analysis of colour in r. *Methods Ecol. Evol.* **10**, 1097–1107 (2019).

681
